# Supplementary material
Source: PubMed Central journal article supplement (PMC3145023)
Supplement: NIHMS310238-supplement-1_si_001.pdf [file NIHMS310238-supplement-1_si_001.pdf]

# Supporting Information

## Membrane-Dependent Effects of a Cytoplasmic Helix on the Structure and Drug Binding of the Influenza Virus M2 Protein

Sarah Cady, Tuo Wang and Mei Hong

Department of Chemistry, Iowa State University, Ames, IA 50011

**Table S1.** Conditions of  $^{13}\text{C}$ - $^2\text{H}$  REDOR experiments of  $\text{d}_{15}$ -Amt complexed M2(21-61) in DMPC bilayers.

| Amt :<br>Tetramer | Spectral region           | $^{13}\text{C}$ carrier<br>(ppm) | REDOR type                   | Mixing time<br>(ms) | Number of<br>scans <sup>a</sup> |
|-------------------|---------------------------|----------------------------------|------------------------------|---------------------|---------------------------------|
| 1 : 1             | S31, D44 $\text{C}\alpha$ | 61.4                             | Multiple $^2\text{H}$ pulses | 15.1 ms             | 125,952                         |
|                   | G34 $\text{C}\alpha$      | 45.0                             | Multiple $^2\text{H}$ pulses | 15.1 ms             | 189,440                         |
|                   | Sidechains                | 23.8                             | Single $^2\text{H}$ pulse    | 8 ms                | 69,632                          |
| 5 : 1             | S31, D44 $\text{C}\alpha$ | 55.8                             | Multiple $^2\text{H}$ pulses | 15.1 ms             | 74,752                          |
|                   | G34 $\text{C}\alpha$      | 44.8                             | Multiple $^2\text{H}$ pulses | 15.1 ms             | 18,432                          |

**Table S2.** Fractions of bound drug estimated from 2D correlation spectra of the M2 peptides and  $^2\text{H}$  spectra of  $d_{15}$ -Amt.

| Amt :<br>Tetramer | Membrane | M2(22-46) |              |                                 | M2(21-61) |              |                                 |
|-------------------|----------|-----------|--------------|---------------------------------|-----------|--------------|---------------------------------|
|                   |          | 2D NC     | $^2\text{H}$ | $^2\text{H}$ splitting<br>(kHz) | 2D NC     | $^2\text{H}$ | $^2\text{H}$ splitting<br>(kHz) |
| 1 : 1             | DMPC     | 65%       | 76%          | 36                              | 50-70%    | 47%          | 37                              |
|                   | VM       | 60%       | 75%          | 39                              | 0%        | 0%           | 0                               |
|                   | VM+      | 96%       | 82%          | 37                              | 0%        | 16%          | 36                              |
| 5 : 1 or<br>4 : 1 | DMPC     | >95%      | -            | -                               | 50-70%    | -            | -                               |
|                   | VM       | 60-70%    | -            | -                               | 0%        | -            | -                               |
|                   | VM+      | 99%       | -            | -                               | 0%        | -            | -                               |

**Table S3.**  $^{31}\text{P}$  chemical shifts of VM and VM+ membranes at 303 K based on Herzfeld-Berger analysis of the MAS sideband intensities.

| Sample | Expt   | $\delta_{\text{iso}}$ (ppm) | $\delta_{11}$ (ppm) | $\delta_{22}$ (ppm) | $\delta_{33}$ (ppm) | $\delta$ (ppm) | $\eta$ |
|--------|--------|-----------------------------|---------------------|---------------------|---------------------|----------------|--------|
| VM     | CP     | -0.36                       | 17                  | 9                   | -27                 | -27            | 0.28   |
|        |        | -1.0*                       | 45*                 | 13*                 | -61*                | -60*           | 0.54*  |
|        |        | -1.6                        | 82                  | 20                  | -107                | -105           | 0.59   |
| VM+    | DP, CP | -0.38                       | 41                  | -20                 | -22                 | 42             | 0.05   |
|        |        | -0.96                       | 49                  | -26                 | -26                 | 50             | 0      |

\* The sideband fitting for the -1.0 ppm peak is not satisfactory, indicating that at least two CSAs are present for this peak. This means that the peak results from lipids in multiple phases of the membrane.

**Table S4.** Summary of short protein-drug distances and chemical shift (CS) perturbations by amantadine for different M2 constructs in different lipid membranes.

| Drug : Tetramer | Lipids | M2(22-46) |            | M2(21-61) |            |
|-----------------|--------|-----------|------------|-----------|------------|
|                 |        | Distance  | CS changes | Distance  | CS changes |
| 1 : 1           | DMPC   | S31       | Yes        | S31       | Yes        |
|                 | VM     | -         | Yes        | -         | No         |
|                 | VM+    | -         | Yes        | -         | No         |
| 5 : 1 or 4 : 1  | DMPC   | S31, D44  | Yes        | S31       | Yes        |
|                 | VM     | -         | Yes        | -         | No         |
|                 | VM+    | -         | Yes        | -         | No         |

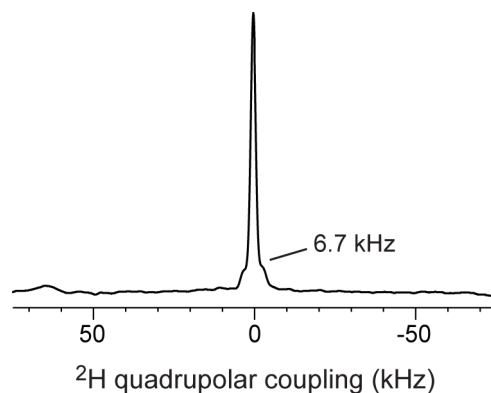

**Figure S1.** Static  $^2\text{H}$  spectrum of  $d_{15}$ -Amt bound to M2(21-61) in the VM membrane at a P/L mole ratio of 1:30. The spectrum is still dominated by an isotropic peak, similar to the spectrum of the 1:15 sample shown in **Fig. 4c**, indicating that drug exclusion from the membrane is due to the high viscosity of the VM membrane rather than the high protein concentration.

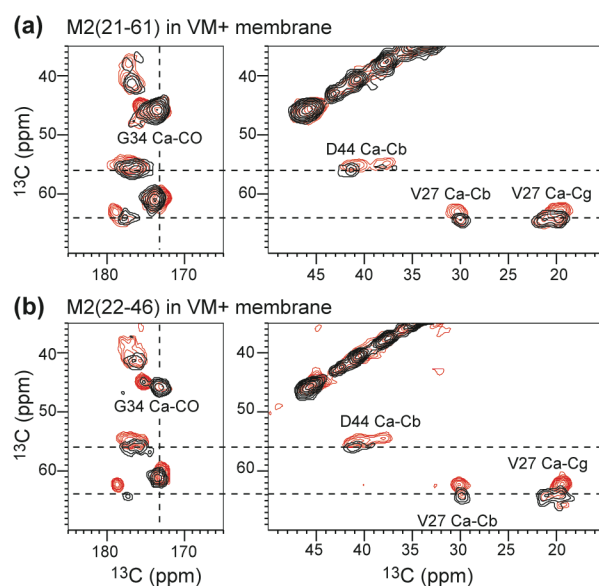

**Figure S2.** 2D  $^{13}\text{C}$ - $^{13}\text{C}$  correlation spectra of M2 peptides in VM+ membranes without (black) and with (red) Amt (1:1 ratio), measured at 273 K. (a) M2(21-61) in VM+ membranes. (b) M2TM(22-46) in VM+ membranes. Note the significant chemical shift changes of V27, G34 and D44 in M2TM, while M2(21-61) shows weaker chemical shift perturbations.
